# Supplementary material
Source: PubMed Central journal article supplement (PMC10852520)
Supplement: Supplementary.Tables_CitAD.Sex.MinorRev.May.16.2018.pdf [file Supplementary.Tables_CitAD.Sex.MinorRev.May.16.2018.pdf]

**Supplementary Table 1.**

Cohen-Mansfield Agitation Inventory (CMAI) and Neurobehavioral Rating Scale, Agitation Scale (NBRS-A) Adjusted Odds Ratios (ORs) by Sex

| Scale                                                | Adjusted 1*    |          | Adjusted 2*    |          |
|------------------------------------------------------|----------------|----------|----------------|----------|
|                                                      | Women vs. Men  |          | Women vs. Men  |          |
|                                                      | OR (95% CI)    | P Value* | OR (95% CI)    | P Value* |
| <i>Cohen-Mansfield Agitation Inventory**</i> , n (%) |                |          |                |          |
| Physically non-aggressive behaviors <sup>1</sup>     | 0.9 (0.4, 2.1) | 0.81     | 0.9 (0.4, 1.8) | 0.71     |
| Physically aggressive behaviors <sup>2</sup>         | 1.7 (0.8, 3.9) | 0.19     | 2.0 (1.0, 4.2) | 0.06     |
| Verbally non-aggressive behaviors <sup>3</sup>       | 1.8 (0.8, 4.0) | 0.16     | 2.5 (1.2, 5.2) | 0.02     |
| Verbally aggressive behaviors <sup>4</sup>           | 1.1 (0.5, 2.3) | 0.90     | 1.0 (0.5, 1.9) | 0.97     |
| <i>Neurobehavioral Rating Scale-A***</i> , n (%)     |                |          |                |          |
| Disinhibition                                        | 1.2 (0.5, 2.8) | 0.61     | 1.2 (0.6, 2.5) | 0.56     |
| Agitation - motor manifestations                     | 1.5 (0.6, 3.8) | 0.37     | 1.2 (0.6, 2.5) | 0.59     |
| Hostility                                            | 1.2 (0.5, 2.9) | 0.60     | 1.4 (0.7, 2.7) | 0.34     |

\*Test for significance is a Wald  $\chi^2$ . Adjusted 1 models include race, age, marital status, sex of caregiver, MMSE and NPI distress. Adjusted 2 models include covariates from Table 1 (excluding duration of dementia) selected using stepwise selection. The Odds Ratio (OR) is for women versus men.  
 \*\*Outcome defined as a symptom score higher than the median and modeled by logistic regression.  
 \*\*\*Outcome defined as rating of 'moderate,' 'moderately severe,' 'severe,' or 'extremely severe.'  
<sup>1</sup> General restlessness, repetitious mannerisms, pacing, trying to get to a different place, handling things inappropriately, hiding, and inappropriate dressing or undressing  
<sup>2</sup> Hitting, pushing, scratching, grabbing things, and grabbing people (kicking, biting)  
<sup>3</sup> Negativism, doesn't like anything, constant requests for attention, verbal bossiness, complaining or whining, relevant interruptions, irrelevant interruptions, and repeating sentences  
<sup>4</sup> Screaming, cursing, temper outbursts, and making strange noises

**Supplementary Table 2.** Neuropsychiatric Inventory (NPI) Adjusted Odds Ratios (ORs) by Sex

| NPI** Domain, No.(%)                                                                                                                                                                                                                                                                                                                                                                                                                                                                                                                     | Adjusted 1*    |          | Adjusted 2*   |          |
|------------------------------------------------------------------------------------------------------------------------------------------------------------------------------------------------------------------------------------------------------------------------------------------------------------------------------------------------------------------------------------------------------------------------------------------------------------------------------------------------------------------------------------------|----------------|----------|---------------|----------|
|                                                                                                                                                                                                                                                                                                                                                                                                                                                                                                                                          | Women vs. Men  |          | Women vs. Men |          |
|                                                                                                                                                                                                                                                                                                                                                                                                                                                                                                                                          | OR (95% CI)    | P Value* | OR (95% CI)   | P Value* |
| Delusions                                                                                                                                                                                                                                                                                                                                                                                                                                                                                                                                | 2.2 (0.9-5.1)  | 0.07     | 2.1 (1.1-4.2) | 0.03     |
| Hallucinations                                                                                                                                                                                                                                                                                                                                                                                                                                                                                                                           | 1.2 (0.4-3.3)  | 0.75     | 1.4 (0.6-3.4) | 0.41     |
| Agitation/Aggression <sup>1</sup>                                                                                                                                                                                                                                                                                                                                                                                                                                                                                                        | --             | --       | --            | --       |
| Depression/Dysphoria                                                                                                                                                                                                                                                                                                                                                                                                                                                                                                                     | 0.7 (0.3-1.7)  | 0.44     | 0.8 (0.4-1.7) | 0.55     |
| Anxiety                                                                                                                                                                                                                                                                                                                                                                                                                                                                                                                                  | 2.3 (1.0-5.3)  | 0.05     | 2.0 (1.0-3.9) | 0.04     |
| Elation/Euphoria <sup>2</sup>                                                                                                                                                                                                                                                                                                                                                                                                                                                                                                            | --             | --       | --            | --       |
| Apathy/Indifference                                                                                                                                                                                                                                                                                                                                                                                                                                                                                                                      | 0.7 (0.3-1.7)  | 0.48     | 0.7 (0.4-1.5) | 0.41     |
| Disinhibition                                                                                                                                                                                                                                                                                                                                                                                                                                                                                                                            | 1.1 (0.5-2.8)  | 0.77     | 1.1 (0.5-2.2) | 0.87     |
| Irritability/Lability                                                                                                                                                                                                                                                                                                                                                                                                                                                                                                                    | 4.4 (1.4-14.1) | 0.01     | 3.2 (1.2-8.9) | 0.02     |
| Motor Disturbance                                                                                                                                                                                                                                                                                                                                                                                                                                                                                                                        | 1.2 (0.5-2.9)  | 0.64     | 1.0 (0.5-1.9) | 0.92     |
| Nighttime Behaviors                                                                                                                                                                                                                                                                                                                                                                                                                                                                                                                      | 0.7 (0.3-1.7)  | 0.48     | 0.8 (0.4-1.6) | 0.54     |
| Appetite/Eating                                                                                                                                                                                                                                                                                                                                                                                                                                                                                                                          | 0.6 (0.2-1.4)  | 0.23     | 0.7 (0.3-1.5) | 0.36     |
| <p>* Presence/absence of symptom modeled by logistic regression, test for significance is a Wald <math>\chi^2</math>. Adjusted 1 models include race, age, marital status, sex of caregiver, MMSE and NPI distress. Adjusted 2 models include covariates from Table 1 (excluding duration of dementia) selected using stepwise selection;</p> <p>** NPI = Neuropsychiatric Inventory; 1. All participants had NPI agitation at baseline due to eligibility criteria; 2. Adjusted model not calculated due to small number of events.</p> |                |          |               |          |
